# Supplementary material for: Depletion of Shine-Dalgarno Sequences Within Bacterial Coding Regions Is Expression Dependent
Source: Oxford University Press journal article supplement (doi:10.1534/g3.116.032227), 2016-10-07
Supplement: 032227_figures1.pdf [file 032227_figures1.pdf]

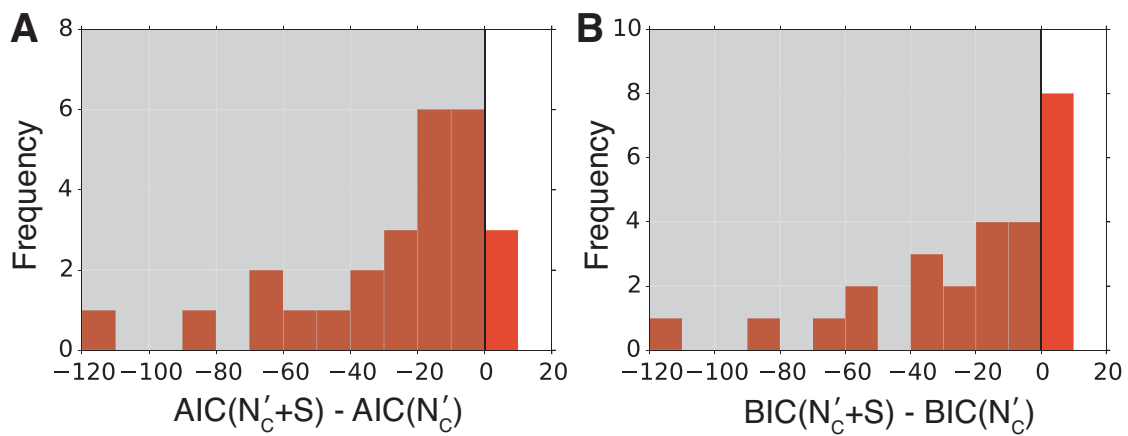

Figure S1: Inclusion of the aSD binding strength score,  $S$ , to multivariate regression between protein abundance and codon usage bias ( $N'_c$ ) enhances total predictive power of multiple regression models as evidenced by lower (A) AIC and (B) BIC scores.
