# Supplementary material for: Depletion of Shine-Dalgarno Sequences Within Bacterial Coding Regions Is Expression Dependent
Source: PubMed Central journal article supplement (PMC5100845; doi:10.1534/g3.116.032227), 2016-09-07
Supplement: supp_g3.116.032227_TableS1.pdf [file supp_g3.116.032227_TableS1.pdf]

Table S1: Single and multivariable regression outputs for *E.coli* gene expression data, aSD binding score ( $S$ ) and codon usage bias ( $N'_C$ ).

| Dataset                                               | n    | $R^2_{SDonly}$ | $p$       | slope  | $R^2_{N'_Conly}$ | $p$        | slope  | $R^2_{both}$ | $p$        | $slope_{SD}$ | $slope_{N'_C}$ |
|-------------------------------------------------------|------|----------------|-----------|--------|------------------|------------|--------|--------------|------------|--------------|----------------|
| Protein abundance (Lu <i>et al.</i> 2007).            | 424  | 0.173          | 2.179e-19 | -1.111 | 0.209            | 1.441e-23  | -4.975 | 0.266        | 1.971e-29  | -0.713       | -3.702         |
| Mean protein abundance (Taniguchi <i>et al.</i> 2011) | 1009 | 0.102          | 1.675e-25 | -1.031 | 0.172            | 2.431e-43  | -6.335 | 0.200        | 5.695e-50  | -0.599       | -5.223         |
| mean mRNA level (Taniguchi <i>et al.</i> 2011)        | 825  | 0.103          | 2.308e-21 | -0.827 | 0.153            | 8.828e-32  | -4.663 | 0.183        | 3.321e-37  | -0.495       | -3.716         |
| mRNA digital counts (Shiroguchi <i>et al.</i> 2012)   | 3002 | 0.071          | 7.657e-50 | -0.595 | 0.233            | 2.097e-175 | -5.615 | 0.250        | 1.805e-188 | -0.305       | -5.151         |
| Translation efficiency (Li <i>et al.</i> 2014)        | 2877 | 0.052          | 1.427e-35 | -0.280 | 0.094            | 4.521e-64  | -1.908 | 0.115        | 3.339e-77  | -0.185       | -1.629         |
