# Supplementary material for: Depletion of Shine-Dalgarno Sequences Within Bacterial Coding Regions Is Expression Dependent
Source: PubMed Central journal article supplement (PMC5100845; doi:10.1534/g3.116.032227), 2016-09-07
Supplement: supp_g3.116.032227_TableS2.pdf [file supp_g3.116.032227_TableS2.pdf]

Table S2: Single and multivariable regression outputs between protein abundance, aSD binding score ( $S$ ) and codon usage bias ( $N'_C$ ) in 26 bacteria.

| Organism                                                         | n    | $R^2_{SD}$ | $p$       | slope   | $R^2_{N'_C}$ | $p$       | slope | $R^2_{both}$ | $p$       | $slope_{SD}$ | $slope_{N'_C}$ |
|------------------------------------------------------------------|------|------------|-----------|---------|--------------|-----------|-------|--------------|-----------|--------------|----------------|
| Escherichia coli str. K-12 substr. MG1655                        | 3736 | 0.0590     | 1.64E-051 | -1.15   | 0.202        | 3.85E-185 | -11.1 | 0.215        | 1.13E-197 | -0.580       | -10.2          |
| Leptospira interrogans serovar Copenhageni str. Fiocruz L1-130   | 2392 | 0.00176    | 0.0224    | 0.130   | 0.0788       | 8.90E-045 | -8.01 | 0.0784       | 1.57E-043 | 0.0128       | -7.99          |
| Campylobacter jejuni subsp. jejuni NCTC 11168 = ATCC 700819      | 769  | 0.00706    | 0.0112    | -0.203  | 0.0718       | 2.48E-014 | -5.05 | 0.0801       | 4.73E-015 | -0.217       | -5.09          |
| Bartonella henselae Houston-1                                    | 1252 | -0.000633  | 0.649     | -0.0264 | 0.0943       | 5.63E-029 | -6.18 | 0.0968       | 8.83E-029 | -0.117       | -6.34          |
| Pseudomonas aeruginosa PAO1                                      | 2417 | 0.0565     | 1.30E-032 | -0.564  | 0.0994       | 3.89E-057 | -5.24 | 0.121        | 1.51E-068 | -0.366       | -4.44          |
| Bacillus anthracis Sterne                                        | 1386 | 0.0672     | 5.99E-023 | -0.720  | 0.208        | 1.72E-072 | -6.63 | 0.225        | 1.27E-077 | -0.377       | -6.04          |
| Staphylococcus aureus subsp. aureus Mu50                         | 1683 | 0.0152     | 2.39E-007 | -0.353  | 0.248        | 2.38E-106 | -7.80 | 0.253        | 1.29E-107 | -0.212       | -7.68          |
| Mycoplasma pneumoniae FH                                         | 381  | -0.000267  | 0.344     | 0.102   | 0.00324      | 0.136     | -1.29 | 0.00282      | 0.216     | 0.0985       | -1.27          |
| Streptococcus pyogenes M1 GAS                                    | 1284 | 0.0613     | 1.33E-019 | -0.793  | 0.332        | 9.36E-115 | -10.4 | 0.343        | 7.32E-118 | -0.345       | -9.89          |
| Legionella pneumophila subsp. pneumophila str. Philadelphia 1    | 743  | 0.0366     | 9.02E-008 | -0.442  | 0.0990       | 9.47E-019 | -7.72 | 0.124        | 2.22E-022 | -0.368       | -7.29          |
| Microcystis aeruginosa NIES-843                                  | 4090 | 0.000138   | 0.211     | -0.0504 | 0.0902       | 2.92E-086 | -6.74 | 0.0911       | 6.45E-086 | -0.0848      | -6.77          |
| Shewanella oneidensis MR-1                                       | 1316 | 0.101      | 1.36E-032 | -0.788  | 0.182        | 1.07E-059 | -6.49 | 0.207        | 3.36E-067 | -0.427       | -5.42          |
| Helicobacter pylori 26695                                        | 1410 | 0.00260    | 0.0309    | 0.166   | 0.00805      | 0.000433  | -2.31 | 0.0101       | 0.000289  | 0.152        | -2.24          |
| Bacteroides thetaiotaomicron VPI-5482                            | 768  | 0.112      | 9.15E-022 | -1.00   | 0.115        | 2.77E-022 | -6.68 | 0.162        | 1.82E-030 | -0.713       | -4.82          |
| Desulfovibrio vulgaris str. Hildenborough                        | 956  | 0.0755     | 2.98E-018 | -0.645  | 0.160        | 2.82E-038 | -6.53 | 0.174        | 1.00E-040 | -0.311       | -5.63          |
| Lactococcus lactis subsp. lactis II1403                          | 1293 | 0.0898     | 1.83E-028 | -0.812  | 0.246        | 1.38E-081 | -7.23 | 0.286        | 1.39E-095 | -0.554       | -6.60          |
| Neisseria meningitidis MC58                                      | 411  | 0.0109     | 0.0194    | -0.198  | 0.00755      | 0.0430    | -1.20 | 0.0112       | 0.0370    | -0.151       | -0.708         |
| Deinococcus deserti VCD115                                       | 1300 | 0.0717     | 5.21E-023 | -0.672  | 0.139        | 2.24E-044 | -6.55 | 0.164        | 1.80E-051 | -0.418       | -5.62          |
| Mycobacterium tuberculosis H37Rv                                 | 3320 | 0.00546    | 1.19E-005 | 0.275   | 0.0295       | 1.27E-023 | -5.31 | 0.0338       | 6.09E-026 | 0.246        | -5.21          |
| Shigella flexneri 2a str. 301                                    | 1648 | 0.0156     | 2.09E-007 | -0.470  | 0.391        | 1.85E-179 | -11.1 | 0.390        | 7.10E-178 | 0.0253       | -11.1          |
| Bacillus subtilis subsp. subtilis str. 168                       | 3914 | 0.0106     | 5.90E-011 | -0.259  | 0.138        | 6.91E-129 | -7.89 | 0.143        | 2.44E-132 | -0.176       | -7.76          |
| Acidithiobacillus ferrooxidans ATCC 23270                        | 1302 | 0.00655    | 0.00201   | -0.158  | 0.0915       | 3.49E-029 | -4.59 | 0.0942       | 4.54E-029 | -0.107       | -4.51          |
| Listeria monocytogenes EGD-e                                     | 469  | 0.0545     | 1.88E-007 | -0.703  | 0.172        | 3.57E-021 | -6.19 | 0.193        | 6.76E-023 | -0.457       | -5.69          |
| Salmonella enterica subsp. enterica serovar Typhimurium str. LT2 | 2561 | 0.0936     | 8.04E-057 | -0.812  | 0.143        | 3.65E-088 | -6.11 | 0.183        | 3.50E-113 | -0.556       | -5.07          |
| Yersinia pestis CO92                                             | 1197 | 0.0498     | 3.46E-015 | -0.640  | 0.0450       | 7.45E-014 | -4.39 | 0.0692       | 9.21E-020 | -0.483       | -3.13          |
| Synechocystis sp. PCC 6803                                       | 1183 | 0.0770     | 1.46E-022 | -0.622  | 0.0294       | 1.70E-009 | -3.29 | 0.101        | 1.73E-028 | -0.602       | -2.99          |
